# Supplementary material
Source: Elsevier journal article supplement (https://www.sciencedirect.com/science/article/pii/S0213911117301218)
Supplement: mmc1 [file S0213911117301218:mmc1.doc]

**Anexo 1.** Marcos de la Evidencia a la Decisión: terminología

Certeza de la evidencia (también denominada calidad o confianza en las estimaciones del efecto)1,2

| Decisores | | | Empleamos el término «decisor» para referirnos a las personas o grupos de personas que deciden | | | | |
| --- | --- | --- | --- | --- | --- | --- | --- |
|  |  |  | si costear o implementar un tratamiento. Sus decisiones pueden basarse en recomendaciones. Los decisores son médicos, pacientes, encargados de hacer política sobre sanidad pública y administradores. | | | | |
|  |  |  |  |  |  |  |  |
| Decisiones y | | | Utilizamos el término «decisión» en el sentido amplio para referirnos tanto a las decisiones sobre reco- | | | | |
| recomendaciones | | | mendaciones (guías de práctica clínica y recomendaciones sobre el sistema de salud o la salud | | | | |
|  |  |  | pública) como para las decisiones sobre qué hacer (decisiones clínicas, de cobertura, política y gestión). | | | | |
|  |  |  | A veces se emplean los dos términos juntos para dejar claro que nos referimos a ambos tipos de decisio- | | | | |
|  |  |  | nes. Los marcos EtD pueden utilizarse para formular recomendaciones (p. ej., los paneles de guías) o tomar decisiones (p. ej., los responsables de las políticas). | | | | |
|  |  |  |  |  |  |  |  |
| Indicador3 | | | Un factor o una variable cualitativa o cuantitativa que proporciona una manera simple y fiable de | | | | |
|  |  |  | medir el éxito, reflejar los cambios asociados a una intervención o ayudar a valorar el rendimiento. | | | | |
| Intervención u opción | | | En el caso de las recomendaciones clínicas y de cobertura, por lo general se usa «intervención» (y «compa- | | | | |
|  |  |  | ración») para denominar a las alternativas comparadas en un marco EtD. En el caso de las reco- | | | | |
|  |  |  | mendaciones o decisiones del sistema de salud o la salud pública, por lo general se usa «opción» | | | | |
|  |  |  | (y «alternativa»). En marcos EtD para alternativas múltiples (dos o más) se utiliza el término «opción». | | | | |
|  |  |  |  |  |  |  |  |
| Panel | | | El grupo de personas que formula las recomendaciones o toma las decisiones. | | | | |
|  |  |  |  |  |  |  |  |
| Fuerza de las | | | Grado hasta el cual podemos confiar en que las consecuencias deseadas de una intervención compen- | | | | |
| Recomendaciones4,5 | | | san las no deseadas. | | | | |
|  |  |  |  |  |  |  |  |
|  |  |  | Recomendación | | El panel tiene un alto grado de confianza en el equilibrio entre las con- | |  |
|  |  |  | fuerte | | secuencias deseadas y no deseadas. | |  |
|  |  |  |  |  |  |  |  |
|  |  |  | Recomendación | | El panel tiene menos confianza en el equilibrio entre las consecuencias de- | |  |
|  |  |  | débil (condicional, | | seadas y no deseadas. En los artículos de los marcos EtD se usa el | |  |
|  |  |  | discrecional o | | término «débil», pero algunas personas prefieren emplear otros. | |  |
|  |  |  | matizada *[qualified]*) | | Además, en ocasiones el contexto precisa de uno distinto. | |  |
|  |  |  |  |  |  |  |  |
|  |  |  |  |  |  |  |  |
|  |  |  |  |  |  |  |  |
|  |  |  |  |  |  |  |  |

En el contexto de una revisión sistemática, la clasificación de la certeza de la evidencia refleja el grado de confianza que se tiene en que las estimaciones del efecto (incluidas la exactitud de la prueba y las asociaciones) sean correctas. En el contexto de la toma de decisiones, la clasificación de la certeza de la evidencia refleja la confianza que se tiene en que las estimaciones del efecto (incluidas la exactitud de la prueba y las asociaciones) sean suficientes para apoyar una decisión o recomendación concreta.

|  | Clasificación |  |  | Definición |  |
| --- | --- | --- | --- | --- | --- |
|  |  |  |  |
|  |  |  |  |  |  |
|  |  |  |  | El panel tiene mucha confianza en que el efecto real se aproxima a la | |
|  | Certeza alta | |  | estimación del efecto. | |
|  |  |  |  |  |  |
|  |  |  |  | El panel tiene una confianza moderada: es probable que el efecto real se | |
|  | Certeza moderada | |  | aproxime a la estimación del efecto, pero existe la posibilidad de que sea | |
|  |  | considerablemente diferente. | |
|  |  |  |  |
|  |  |  |  |  |  |
|  |  |  |  | La confianza del panel en la estimación del efecto es reducida: el efecto real | |
|  | Certeza baja | |  | puede ser considerablemente diferente a la estimación del efecto. | |
|  |  |  |  |  |  |
|  |  |  |  | El panel tiene muy poca confianza en la estimación del efecto: es probable | |
|  | Certeza muy baja | |  | que el efecto real sea considerablemente diferente a la estimación. | |
|  |  |  |  |  |  |

1. Guyatt GH, Oxman AD, Kunz R, et al.; GRADE Working Group. What is ‘quality of evidence’ and why is it important to clinicians? BMJ. 2008; 336:995-8.

1. Balshem H, Helfand M, Schunemann H, et al. GRADE guidelines 3. Rating the quality of evidence – introduction. J Clin Epidemiol. 2011;64:401-6.
2. Fretheim A, Oxman AD, Lavis JN, et al. SUPPORT Tools for evidence-informed health Policymaking (STP). 18. Planning monitoring and evaluation of policies. Health Res Policy Syst. 2009;7(Suppl 1):S18.
3. Guyatt GH, Oxman AD, Kunz R, et al.; GRADE Working Group. Going from evidence to recommendations. BMJ. 2008;336:1049-51.
4. Andrews J, Guyatt GH, Oxman AD, et al. GRADE guidelines: 14. Going from evidence to recommendations: the significance and presentation of recommendations. J Clin Epidemiol. 2013;66:719-25.
