# Supplementary material
Source: Elsevier journal article supplement (https://www.sciencedirect.com/science/article/pii/S0213911117301218)
Supplement: mmc2 [file S0213911117301218:mmc2.doc]

**Anexo 2: Marco GRADE de la evidencia a la decisión para recomendaciones clínicas**

En los siguientes enlaces encontrará una versión interactiva de este marco que incluye información de subgrupos: [http://ietd.epistemonikos.org/#/frameworks/54992ce9352a502d58179c5c/question](http://ietd.epistemonikos.org/" \l "/frameworks/54992ce9352a502d58179c5c/question)

y <http://dbep.gradepro.org/profile/3879A46D-7E19-FEBA-9B96-BC2B3F996EB1>


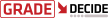
*Marco interactivo de la evidencia a la decisión*

1. ¿Debe añadirse la bedaquilina a un régimen de tratamiento de base con fármacos recomendados por la OMS para pacientes con tuberculosis multirresistente (MDR-TB por sus siglas en inglés)?

**Autores:**A Oxman, P Alonso-Coello, J Moberg, H Schunemann

**Fecha:**Febrero 2015

PREGUNTA

Detalles de la pregunta

**Problema**: Personas con tuberculosis multirresistente (MDR-TB)

**Opción**: Bedaquilina + tratamiento de base para la MDR-TB

**Comparación**: Tratamiento de base para la MDR-TB solo (régimen de tratamiento con fármacos recomendados por la OMS)

**Desenlaces principales**: Curación al finalizar el estudio, acontecimientos adversos graves, mortalidad, tiempo de conversión, conversión del cultivo al final del tratamiento y resistencia adquirida a otros fármacos

**Marco**: A escala mundial, clínicas de MDR-TB

**Perspectiva**: Poblacional

**Conflictos de intereses:** El panel ha informado que sus miembros declararon conflictos de intereses de carácter menor o no declararon ninguno

Antecedentes

El surgimiento de la farmacorresistencia es una amenaza importante para el control y el tratamiento de la tuberculosis (TB) a escala mundial. La OMS estima que en el año 2011 se dieron alrededor de 310.00 casos de tuberculosis multirresistente (resistentes a la rifampicina y la isoniazida como mínimo) entre los casos notificados de pacientes con TB. Los regímenes de tratamiento actuales para la tuberculosis multirresistente están lejos de ser satisfactorios: la duración total es de 20 meses o más y precisa de la administración diaria de fármacos que son más tóxicos y menos efectivos que aquellos que se usan para tratar la tuberculosis farmacosensible.

EVALUACIÓN

Problema

¿Constituye el problema una prioridad?

JuICIO

| No se sabe | Varía | No | Probablemente No | Probablemente Sí | Sí |
| --- | --- | --- | --- | --- | --- |

Evidencia procedente de la investigación

De los pacientes con MDR-TB a nivel mundial que empezaron tratamiento en el 2009, solamente el 48% recibió el tratamiento de forma satisfactoria. Este dato es el resultado de la elevada mortalidad (15%) y de las pérdidas de seguimiento (28%), habitualmente asociadas a reacciones adversas a los fármacos, entre otros factores. [2]

Efectos deseados

¿Cuál es la magnitud los efectos anticipados deseados?

JuICIO

| No se sabe | Varía | No importante | Pequeña | Moderada | Grande |
| --- | --- | --- | --- | --- | --- |

Evidencia procedente de la investigación

Resumen de hallazgos: La bedaquilina para la tuberculosis multirresistente ([Ver aquí una versión interactiva](https://isof.epistemonikos.org/" \l "/)) (Adaptada de la guía para el tratamiento de la MDR-TB de la OMS: *The Use of Bedaquiline in the Treatment of Multidrug-Resistant Tuberculosis: Interim Policy Guidance*. Geneve: World Health Organization; 2013. [2])

**Participantes**: Personas con tuberculosis multirresistente (MDR-TB)

**Intervención:** Bedaquilina + tratamiento de base para la MDR-TB

**Comparación:** Tratamiento de base para la MDR-TB solo (régimen de tratamiento con fármacos recomendados por la OMS)


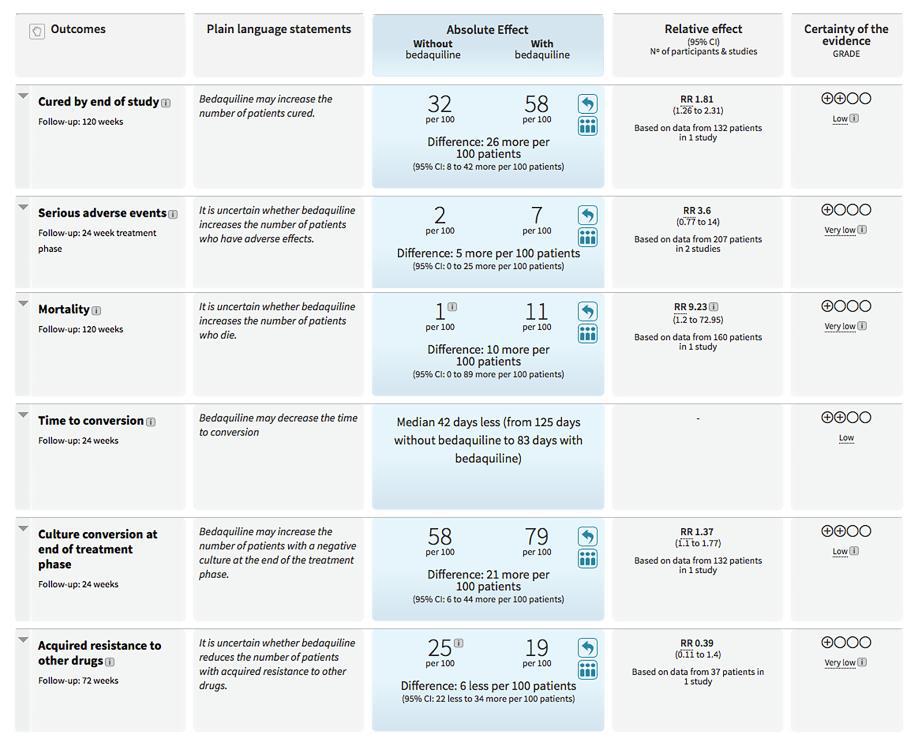


Efectos no deseados

¿Cuál es la magnitud de los efectos anticipados no deseados?

JuICIO

| No se sabe | Varía | Grande | Moderada | Pequeña | No importante |
| --- | --- | --- | --- | --- | --- |

Evidencia procedente de la investigación

Ver la tabla del resumen de hallazgos anterior.

Certeza de la evidencia

¿Cuál es la certeza global de la evidencia de los efectos?

JuICIO

| No hay estudios incluidos | Muy baja | Baja | Moderada | Alta |
| --- | --- | --- | --- | --- |

Evidencia procedente de la investigación

Ver el resumen de hallazgos anterior.

Valores

¿Hay incertidumbre, o variabilidad, importante en el valor que dan las personas a los desenlaces principales?

JuICIO

| Incertidumbre o variabilidad importante | Incertidumbre o variabilidad  Posiblemente importante | Incertidumbre o variabilidad Probablemente no importante | Incertidumbre o variabilidad  No importante |
| --- | --- | --- | --- |

Evidencia procedente de la investigación

No se ha encontrado evidencia.

Consideraciones adicionales

Los pacientes consideraron como desenlaces críticos el éxito del tratamiento (curación al finalizar el estudio), los acontecimientos adversos graves y la mortalidad. Por otro lado, consideraron importantes, pero no críticos, el tiempo de conversión del cultivo y la resistencia. El panel considera que, si bien hay poca variabilidad en el valor que dan las personas a evitar la muerte, existe incertidumbre y probable variabilidad en el valor que otorgan a los otros desenlaces.

En el caso de pacientes con diagnóstico de MDR-TB reciente, es probable que el éxito del tratamiento no compense el riesgo de recibir un fármaco nuevo con un aumento potencial de la mortalidad, efectos adversos graves y certeza de la evidencia muy baja. En el caso de pacientes con tuberculosis ultrarresistente y opciones, de tenerlas, limitadas, el panel determinó que es probable que los efectos deseados compensen los indeseados.

Balance entre los efectos

El equilibrio entre los efectos deseados y no deseados, ¿favorece a la opción o a la comparación?

JuICIO

| No | Varía | Favorece a la comparación | Probablemente favorece a la comparación | Ni a la opción ni a la comparación | Probablemente favorece a la opción | Favorece a la opción |
| --- | --- | --- | --- | --- | --- | --- |

Evidencia procedente de la investigación

Ver la tabla del resumen de hallazgos anterior.

Recursos necesarios

¿Cuál es la magnitud de los recursos necesarios (costes)?

JuICIO

| No se sabe | Varía | Costes altos | Costes moderados | Costes o ahorro mínimo | Ahorro moderado | Gran ahorro |
| --- | --- | --- | --- | --- | --- | --- |

Evidencia procedente de la investigación

Los datos de los costes del caso base en cada país se sacaron de estudios publicados [1], y los autores proporcionaron datos suplementarios adicionales. Para las primeras estimaciones del coste unidad por tratamiento con bedaquilina se usó un régimen de coste de 900 dólares estadounidenses (en el caso de países en la lista de elegibilidad del Fondo Mundial) y de 3000 dólares estadounidenses (en el caso de otros países) para un ciclo completo de bedaquilina basándose en las estimaciones de Janssen. Además, se sumaron los costes de cuatro electrocardiogramas.

Para estimar el posible ahorro en costes de un ciclo reducido con bedaquilina, se estimaron los costes de una fase intensiva de seis meses. Los costes de la fase intensiva de ocho meses se ajustaron para tener en cuenta las reducciones en la hospitalización y en la duración requerida para el tratamiento con agentes de segunda línea por vía parenteral (fármacos inyectables para la tuberculosis).

En los casos en los que no se recurrió ampliamente a la hospitalización en la fase intensiva de tratamiento (Perú y Nepal) se aplicó una reducción en el coste de las visitas a la clínica. Los demás costes (gestión del programa, coste de las pruebas, etc.) se asumieron con normalidad para que fueran iguales a los costes del régimen de tratamiento con bedaquilina no reducido.

Certeza de la evidencia de los recursos necesarios

¿Cuál es la certeza de la evidencia de los recursos necesarios (costes)?

JuICIO

| No hay estudios incluidos | Muy baja | Baja | Moderada | Alta |
| --- | --- | --- | --- | --- |

Evidencia procedente de la investigación

Los resultados fueron ambiguos en zonas con rentas bajas y dependieron mucho de las suposiciones sobre la generalizabilidad de los resultados del ensayo a los contextos habituales. El grupo de expertos observó que se necesitarían más análisis para probar la robustez de las suposiciones en diferentes contextos y para evaluar por separado la asequibilidad [1].

Coste-efectividad

El coste-efectividad de la opción, ¿favorece a la opción o a la comparación?

JuICIO

| No se sabe | Varía | Favorece a la comparación | Probablemente favorece a la comparación | Ni a la opción ni a la comparación | Probablemente favorece a la opción | Favorece a la opción |
| --- | --- | --- | --- | --- | --- | --- |

Evidencia procedente de la investigación

Un consultor independiente contratado por la OMS modeló la relación de coste-efectividad incremental de añadir la bedaquilina a los regímenes de tratamiento para la MDR-TB recomendados por OMS para que un grupo de expertos lo revisara [2]. El modelo asumía que se añadiría la bedaquilina al tratamiento de todos los pacientes que empezaran tratamiento para la MDR-TB. Se examinaron diversos escenarios para medir el coste-efectividad de la bedaquilina en dichos contextos. De acuerdo con las suposiciones del modelo, se valoraron como rentables los regímenes de tratamiento con bedaquilina en la mayoría de los escenarios. No obstante, los resultados fueron ambiguos en las zonas con rentas bajas y dependieron mucho de las suposiciones sobre la generalizabilidad de los resultados del ensayo a los contextos habituales.

Consideraciones adicionales

El coste-efectividad varía entre los contextos según los datos y suposiciones en que se basara el modelo, que pueden no reflejar situaciones reales. Además, el modelo empleado para el análisis de coste-efectividad tenía algunas limitaciones (p. ej.: no incluía los acontecimientos adversos graves, el efecto en la transmisión, etc.).

Dado que la recomendación del grupo de expertos es que se use la bedaquilina solamente en subgrupos seleccionados de todos los pacientes con MDR-TB (en lugar de en todos los pacientes con MDR-TB incluidos en el análisis de coste-efectividad), el modelo coste-efectividad necesita mejorarse para que haya resultados disponibles para estos subgrupos.

Equidad

¿Cuál sería el impacto sobre la equidad en salud?

JuICIO

| No se sabe | Varía | Bajo | Probablemente bajo | Probablemente nulo | Probablemente alto | Alto |
| --- | --- | --- | --- | --- | --- | --- |

Evidencia procedente de la investigación

No se ha encontrado evidencia.

Consideraciones adicionales

Es complicado valorar si la bedaquilina tendría un impacto sobre la equidad debido a la incertidumbre sobre la asequibilidad y sus efectos. Si es efectiva pero no está disponible para algunas personas porque no es asequible ni accesible, la equidad disminuye. La falta de acceso a la monitorización también puede mermar la equidad. Por otro lado, el panel opina que, en la medida en que los efectos deseados de la bedaquilina compensan los no deseados, garantizar su acceso a pacientes con tuberculosis ultrarresistente podría aumentar la equidad.

Aceptabilidad

¿Es la opción aceptable para las partes interesadas principales?

JuICIO

| No se sabe | Varía | No | Probablemente no | Probablemente sí | Sí |
| --- | --- | --- | --- | --- | --- |

Evidencia procedente de la investigación

No se ha encontrado evidencia.

Consideraciones adicionales

Puede que parte del personal sanitario se muestre reacio a tratar con bedaquilina a los pacientes dada la muy baja certeza de la evidencia y dada la posiblemente alta mortalidad y los efectos adversos graves. Por otro lado, el panel ha establecido que también puede haber quien se muestre reacio a no tratar a pacientes con mal pronóstico.

Factibilidad

¿Es factible implementar la opción?

JUICIO

| No se sabe | Varía | No | Probablemente no | Probablemente sí | Sí |
| --- | --- | --- | --- | --- | --- |

Evidencia procedente de la investigación

No se ha encontrado evidencia.

Consideraciones adicionales

Los costes y las restricciones reguladoras pueden obstaculizar el aumento del uso de la bedaquilina. El panel cree que las comorbilidades (especialmente las cardiopatías y hepatopatías) deberían tratarse y monitorizarse clínicamente.

CONCLUSIONES

Tipos de recomendación

| Recomendación fuerte contra la opción | Recomendación condicional contra la opción | Recomendación condicional a favor de la opción o de la comparación | Recomendación condicional a favor de la opción | Recomendación fuerte a favor de la opción |
| --- | --- | --- | --- | --- |

Recomendación

El panel sugiere que se añada bedaquilina a un régimen de tratamiento para la MDR-TB recomendado por la OMS en pacientes adultos con las siguientes condiciones (recomendación condicional, calidad de la evidencia muy baja):

- Según las recomendaciones de la OMS, no se puede diseñar un régimen de tratamiento efectivo con cuatro fármacos de segunda línea recomendados además de pirazinamida;

- Hay evidencia documentada de la resistencia a las fluoroquinolonas además de la multirresistencia.

Además:

- Los pacientes deben seguir un proceso de toma de decisiones debidamente informado.

- La bedaquilina debe usarse con precaución en personas con infección por VIH, así como en pacientes con comorbilidades (como la diabetes) o personas que consuman drogas o alcohol, ya que la información es limitada o inexistente.

- La bedaquilina debe utilizarse durante un máximo de seis meses con las dosis sugeridas: 400 mg diarios durante las dos primeras semanas y, después, 200 mg, tres veces por semana durante las 22 semanas restantes).

- No debe añadirse bedaquilina sola a ningún régimen de tratamiento fallido.

- Es obligatorio realizar pruebas iniciales y monitorización para detectar la prolongación del intervalo QT y la aparición de arritmia.

- Las comorbilidades (especialmente las hepatopatías y cardiopatías) deben tratarse y monitorizarse clínicamente.

- En caso de que no haya una prueba de farmacosensibilidad a la bedaquilina específicamente, la resistencia a este fármaco debe monitorizarse a través de la medición de las concentraciones inhibidoras mínimas.

Justificación

Dados los importantes daños potenciales y la incertidumbre tanto los beneficios como sobre los daños de la bedaquilina, el panel ha concluido que la mayoría de pacientes optaría por no recibir bedaquilina. Sin embargo, en el caso de los pacientes con TB ultrarresistente y con pocas opciones o ninguna, el panel concluyó que la mayoría de pacientes elegiría recibir bedaquilina.

Esta recomendación es condicional y debe implementarse solamente en subpoblaciones muy concretas y en circunstancias muy específicas. Además, la recomendación es provisional, ya que el panel ha decidido revisarla en 2015 o antes si se dispusiera de datos sobre la eficacia y seguridad de la bedaquilina (obtenidos de estudios de post-comercialización o de estudios y ensayos en curso).

Justificación detallada

| Efectos deseados: Más pacientes recibieron tratamiento con la bedaquilina de forma satisfactoria (curación al finalizar el estudio) en comparación con el tratamiento sin la bedaquilina (26 más por 100; IC del 95%: de 8 a 42 más).  Efectos no deseados: Hubo más muertes (10 más de 100; IC del 95%: de 0 a 53 más) y más acontecimientos adversos graves (5 más; IC del 95%: de 0 a 25 más) con la bedaquilina en comparación con el tratamiento sin la bedaquilina.  Certeza de la evidencia: La calidad de la evidencia de mortalidad y acontecimientos adversos graves era muy baja, y la calidad de la evidencia de tratamiento satisfactorio era baja (curación al finalizar el tratamiento) debido a la imprecisión (tamaño muestral pequeño y pocos acontecimientos), el riesgo de sesgo (exclusión inapropiada de 19 pacientes asignados aleatoriamente) y el uso de un desenlace intermedio (conversión del cultivo).  Valores: Si bien hay poca variabilidad en el valor que dan las personas a evitar la muerte, existe incertidumbre y probable variabilidad en cuanto al valor que otorgan al resto de desenlaces.  Balance entre los efectos: En el caso de pacientes con diagnóstico de MDR-TB reciente, es probable que el aumento del éxito del tratamiento (curación al finalizar el estudio) no compense el riesgo de recibir un fármaco nuevo con un potencial aumento de la mortalidad, efectos adversos graves y calidad de la evidencia muy baja. En el caso de pacientes con tuberculosis ultrarresistente con opciones limitadas o ninguna, es probable que los efectos deseados compensen los indeseados. |
| --- |

Consideraciones de subgrupos

Se sugiere la bedaquilina únicamente para pacientes con TB ultrarresistente en condiciones específicas.

Consideraciones para la implementación

- Debe crearse un procedimiento para asegurar que los pacientes tomen decisiones informadas.
- Debe disponerse de equipamiento para realizar las pruebas iniciales y la monitorización para detectar prolongación del intervalo QT y arritmia.
- Deben monitorizarse las cardiopatías y hepatopatías.

Monitorización y evaluación

- Debe reforzarse a nivel nacional la notificación espontánea de reacciones adversas al fármaco y crearse un procedimiento de farmacovigilancia activa entre los grupos de pacientes tratados con el fármaco.
- Debe vigilarse la resistencia a la bedaquilina.
- Debe vigilarse la resistencia a otros fármacos para la tuberculosis siguiendo las recomendaciones de la OMS.

Prioridades de investigación

- Deben acelerarse los ensayos clínicos de fase 3 sobre la eficacia y seguridad de la bedaquilina en el tratamiento de la MDR-TB, prestando especial atención a la mortalidad (causas de la muerte incluidas),
- Desarrollo de una prueba fiable para la resistencia a la bedaquilina.
- Estudios de farmacocinética, seguridad y eficacia en poblaciones específicas (población pediátrica, pacientes con VIH, consumidores de drogas y alcohol, población anciana, embarazadas, personas con TB extrapulmonar, con diabetes).
- Estudios de seguridad que incluyan el tipo, la frecuencia y la gravedad de los acontecimientos adversos (a corto y largo plazo).
- Interacciones fármaco-fármaco, incluyendo interacciones con otros fármacos para la TB existentes y de reciente desarrollo y antirretrovirales.
- Impacto sobre la mortalidad (incluyendo la causa de la muerte).
- Adquisición de resistencia a la bedaquilina y a otros fármacos para la TB.
- Duración del tratamiento y administración de las dosis.
- Valores de los pacientes.
- Más investigación sobre la validez de la conversión del cultivo como marcador indirecto del desenlace del tratamiento.

PERFIL DE LA EVIDENCIA

**Perfil de la evidencia**: ¿Añadir la bedaquilina a un régimen de tratamiento de base siguiendo las recomendaciones de la OMS mejora los desenlaces de los pacientes con MDR-TB?

**Referencia:** Organización Mundial de la Salud. The use of bedaquiline in the treatment of multidrug-resistant tuberculosis: Interim policy guidance. Geneva: World Health Organization, 2013.

| **Evaluación de la evidencia** | | | | | | | **N.º de pacientes** | | | **Efecto** | | | **Certeza de la evidencia** | **Importancia** |
| --- | --- | --- | --- | --- | --- | --- | --- | --- | --- | --- | --- | --- | --- | --- |
| **N.º de estudios** | **Diseño** | **Riesgo de sesgo** | **Inconsis-**  **tencia** | **Falta de direcciona-**  **lidad** | **Imprecisión** | **Otras conside-**  **raciones** | **Bedaquilia añadida a SLBR** | **SLBR solo** | | **Relativo**  **(IC del 95%)** | **Absoluto**  **(IC del 95%)** | |  |  |
| Personas curadas al finalizar el estudio: seguimiento de 120 semanas (C208 Fase 2: mITT) 1,2 | | | | | | | | | | | | | | |
| 1 | Ensayos aleatorizados | No  importante 4 | No importante | Importante 5 | Importante 5 | Ninguna | 38/66 1 (57,6%) | 21/66 1 (31,8%) | | **RR 1,81**  (de 1,26 a 2,31) 3,6 | | 260 más por 1.000  (de 80 más a 420 más) | **** BAJA | CRÍTICA |
| Acontecimientos adversos graves durante la fase de investigación de tratamiento de 24 semanas (C208 Fases 1 y 2: ITT) 7 (evaluado s mediante los resultados clínicos y de laboratorio) | | | | | | | | | | | | | | |
| 2 | Ensayos aleatorizados | No importante | No importante | Importante 12 | Muy importante 3 | Ninguna | 7/102 10 (6,9%) | 2/105 (1,9%) | | **RR 3,6**  (de 0,77 a 14,00) | | 50 más por 1.000 (de 0 a 250 más) | **** MUY BAJA | CRÍTICA |
| Mortalidad hasta la finalización del estudio a las 120 semanas (C208 Fase 2: ITT) (muertes notificadas) | | | | | | | | | | | | | | |
| 1 | Ensayos aleatorizados | No importante | No importante | Importante 12 | Muy importante 3 | Ninguna | 9/79 11  (11,4%) | 1/81 11  (1,2%) | | **RR 9,23**  (de 1,20 a 72,95) 13,14 | | 102 más por 1.000 (de 2 más a 888 más) | **** MUY BAJA | CRÍTICA |
| Tiempo de conversión en 24 semanas15 (C208 Fase 2: mITT1) (medido con criterios de valoración microbiológicos - MGIT960) | | | | | | | | | | | | | | |
| 1 | Ensayos aleatorizados | No  importante 4 | No importante | Importante 16 | Importante 3 | Ninguna | n=66 1 mediana=83 días | n=66 1 mediana=125 días | |  | |  |  |  |
| Conversión del cultivo a las 24 semanas18 (C208 Fase 2: mITT1) (evaluado mediante criterios de valoración microbiológicos - MGIT960). | | | | | | | | | | | | | | |
| 1 | Ensayos aleatorizados | No  importante 4 | No importante | Importante 16 | Importante 3 | Ninguna | 52/66 1 (78,8%) | 38/66 1 (57,6%) | | **RR 1,37**  (de 1,1 a 1,77) 19 | | 21 más por 100 (de 6 más a 44 más) | ****  BAJA | CRÍTICA |
| Resistencia adquirida a las fluoroquinolonas, los aminoglucósidos o a la capreomicina a las 72 semanas 21 (C208 Fase 2: mITT) 20 (evaluada mediante criterios de valoración microbiológicos). | | | | | | | | | | | | | | |
| 1 | Ensayos aleatorizados | Importante 22 | No importante | Importante 16 | Muy importante 3 | Ninguna | 2/10 20 (20%) | 14/27 20 (51,9%) | **RR 0,39**  (de 0,11 a 1,40) 23 | | | 32 menos por 100 (de 46 menos 21 más) | ****  MUY  BAJA | CRÍTICA |
| 7/27 (25,9%) 24 | 6 menos (de 22 menos a 34 más) 24 |

1. La población por intención de tratar modificada (mITT) en el ensayo C208 contenía 66 sujetos en cada grupo de aleatorización tras excluir a 13 sujetos (16,5%) tratados con bedaquilina y 15 sujetos (18,5%) tratados con placebo que no tenían Mycobacterium TB multirresistente ni pre-ultrarresistente al inicio o cuyos resultados de MGIT no se consideraron evaluables.
2. La curación está definida como cinco cultivos negativos consecutivos durante los 12 meses finales de tratamiento, o si solamente se notifica un cultivo positivo durante ese periodo, entonces tres cultivos negativos consecutivos más de muestras tomadas con una diferencia de al menos 30 días.
3. Datos de final del estudio obtenidos de la diapositiva proporcionada por Janssen tras la reunión con la FDA. En esta diapositiva se menciona el “éxito del tratamiento”, pero más adelante la empresa aclaró que se estaba usando la misma definición de “curación” de la OMS.
4. Representatividad de la población por intención de tratar modificada (mITT) (supuestos hechos para la población ITT).
5. El pequeño tamaño muestral y el amplio intervalo de confianza resultante limitan la precisión: pocas (= grave) o muy pocas (= graves) observaciones.
6. Esta diferencia es estadísticamente significativa (Fisher p=0,005; Pearson p=0,003).
7. Análisis en población por intención de tratar (ITT), C208 Fases 1 y 2 combinadas (n=102 en el grupo de la bedaquilina, 105 en el grupo de placebo);
8. Ver: Janssen, documento informativo para el meeting con el comité asesor de fármacos antiinfeccioso (Briefing document to the Anti-Infective Drugs Advisory Committee Meeting, 28 November 2012. NDA 204-384), denominado “BD”. La tabla 2 del BD, página 14; tabla 51, página 184; y las diapositivas preparadas por Janssen y presentadas ante la FDA en dicha reunión (denominado “JRD”), JRD diapositiva 71.
9. El riesgo de efectos secundarios (ej.: prolongación del intervalo QT) podría ser mayor si se usara la clofacimina; preocupación por que el seguimiento sea corto a pesar de la larga semivida de la bedaquilina.
10. Ver diapositiva 63 de JRD.
11. Ver Tabla 45 BD, Anexo 4; Análisis en la población por intención de tratar, ensayo C208 de Fase 2 (n=79 en el grupo de la bedaquilina, 81 en el de placebo); mortalidad entre todos los sujetos expuestos a la bedaquilina en el estudio de fase 2 C208, independientemente de cuando sucedieron las muertes (es decir, incluyendo muertes después de las 120 semanas), recuento de 10 muertes en el grupo de la bedaquilina y dos muertes en el grupo de placebo. Considerando el número de muertes estrictamente hasta el punto de corte de 120 semanas, ha habido 9 muertes en el grupo de la bedaquilina y una en el grupo de placebo. Se han usado los datos crudos para la mortalidad a 120 semanas en el grupo de la bedaquiliina y de placebo (aquí se han corregido los números de los documentos de referencia).
12. Preocupación porque si se administra un tratamiento antirretroviral a pacientes con VIH, se pueden dar interacciones fármaco-fármaco y afectar a la mortalidad y a los acontecimientos adversos graves.
13. Test exacto de Fisher p=0,017; Pearson p=0,014.
14. El desequilibrio entre las muertes no está claro. Ni los factores clínicos (como el estatus de VIH o la gravedad de una enfermedad) ni los desenlaces clínicos (mejora de la enfermedad o no) parecen estar asociados a un mayor/menor riesgo de muerte.
15. Ver Figura 22 en BD.
16. Preocupación en cuanto a la extrapolación a la población general. El régimen de tratamiento de base se consideró subóptimo y que no correspondía con los regímenes de tratamiento recomendados por la OMS (PZA con cuatro fármacos de segunda línea).
17. Modelo de riesgos proporcionales de Cox: HR 2,44 [IC del 95% 1,57-3,80] p<0,0001 (p. 16 de BD).
18. Ver la diapositiva EF-142 de JRD.
19. Test exacto de Fisher p=0,015; Pearson p=0,009.
20. Análisis en muestras pareadas, población por intención de tratar modificada (n=10 en el grupo de la bedaquilina, 27 en el grupo de placebo).
21. Ver diapositiva 52 de JRD;
22. Identificación seleccionada y diferencial de la resistencia adquirida a la bedaquilina. La comparación entre el último cultivo positivo disponible y el inicial de todos los pacientes hubiera sido útil. Se debe señalar la resistencia adquirida a la bedaquilina de los que no responden al tratamiento en el grupo de la bedaquilina (mediante el punto indicativo de sensibilidad).
23. Test exacto de Fisher p=0,14; Pearson p=0,08.
24. El panel de expertos asumió que el riesgo inicial real de desarrollar resistencia sería considerablemente menor, aproximadamente un 25%, si las pruebas se hubieran hecho sobre la última muestra positiva disponible.

MGIT: tubo indicador de crecimiento bacteriano; MDRH: multirresistente; R-TB: tuberculosis resistente; Pre-XDR-TB: tuberculosis pre-ultrarresistente; mITT: intención de tratar modificada; ITT: intención de tratar; FDA: U S Food and Drug Administration (Agencia del medicamento de EE.UU.); JRD: conjunto de diapositivas preparadas por Janssen y presentadas a la FDA; BD: briefing document (documento informativo); OMS: Organización Mundial de la Salud; PZA: pirazinamida.

REFERENCIAS

1. Fitzpatrick C, Floyd K. A systematic review of the cost and cost effectiveness of treatment for multidrug-resistant tuberculosis. Pharmacoeconomics. 2012 Jan;30(1):63-80.
2. The Use of Bedaquiline in the Treatment of Multidrug-Resistant Tuberculosis: Interim Policy Guidance. Geneva: World Health Organization; 2013. Available from: http://www.ncbi.nlm.nih.gov/books/NBK154134/?report=classic (Accessed on the 21st March 2016)
