# Supplementary material
Source: Elsevier journal article supplement (https://www.sciencedirect.com/science/article/pii/S0213911117301218)
Supplement: mmc3 [file S0213911117301218:mmc3.doc]

**Anexo 3.** Presentación GRADE de la Recomendación a la Decisión (RtD) de un marco de la Evidencia a la Decisión (EtD) para una recomendación clínica.

La presentación de la Recomendación a la Decisión (RtD) del marco de la Evidencia a la Decisión (EtD) para una recomendación clínica puede emplearse para adaptar las recomendaciones a contextos específicos o para que los decisores determinen si se implementa una recomendación en su ámbito. Está disponible (en inglés) en: https://ietd.epistemonikos.org/#/summary/54d1d6a82b386743138526b2/policymakers
